1 **Contrasting response of two *Lotus corniculatus* L. accessions to**  
2 **combined waterlogging-saline stress**

3 Antonelli, C.J.<sup>1#</sup>; Calzadilla, P.I.<sup>1Ⓜ</sup>; Campestre M.P.; Escaray F.J.; Ruiz, O.A.\*

4 Instituto Tecnológico de Chascomús (IBB-INTECH), UNSAM-CONICET, Av. Intendente Marino  
5 Km 8.2 CC 164 (B7130IWA), Chascomús, Bs As, Argentina.

6

7 <sup>1</sup>These authors contributed equally to this work

8 \*Corresponding author: Oscar Adolfo Ruiz; [ruiz@intech.gob.ar](mailto:ruiz@intech.gob.ar); Tel: (0054) - 2241 430323

9 #Present address: Instituto de Fisiología Vegetal (INFIVE), Universidad Nacional de La Plata  
10 (UNLP) y Consejo Nacional de Investigaciones Científicas y Técnicas (CONICET), Diagonal 113  
11 No. 495, 1900 La Plata, Argentina

12 Ⓜ Present address: Department of Earth and Environmental Sciences, Faculty of Science and  
13 Engineering, University of Manchester, Manchester M13 9PT, UK

14

15 **Abstract**

16 Waterlogging and salinity impair crops growth and productivity worldwide, being  
17 their combined effects larger than the additive effects of both stresses separately. Recently,  
18 a new *Lotus corniculatus* accession has been collected from a coastal area with a high  
19 frequency of waterlogging-saline stress events. This population is diploid and has potential  
20 to increase nutritional values of *Lotus* cultivars used as forages. Due to its environmental  
21 niche, we hypothesize that this accession would show a better adaptation to combined  
22 waterlogging-saline stress compared to another commonly used tetraploid *L. corniculatus*  
23 (cv. San Gabriel). Shoot and root growth under waterlogging, salinity and combined  
24 waterlogging-saline treatments were addressed, together with chlorophyll fluorescence and  
25 gas exchange measurements. Results showed that salinity and waterlogging effects were  
26 more severe for the tetraploid accession, being the differences larger under the combined  
27 stress condition. In addition, Na<sup>+</sup>, Cl<sup>-</sup> and K<sup>+</sup> concentrations were measured in young and old  
28 leaves, and in roots. A larger accumulation of Na<sup>+</sup> and Cl<sup>-</sup> was observed under both saline  
29 and combined stress treatments for the tetraploid *L. corniculatus*, for which ion toxicity  
30 effects were evident. The expression of the *NHX1* and *CLC* genes, coding for Na<sup>+</sup> and Cl<sup>-</sup>  
31 transporters respectively, was only increased in response to combined stress in the diploid  
32 *L. corniculatus* plants, suggesting that ion compartmentalization mechanisms were induced  
33 in this accession. As a conclusion, the recent characterized *L. corniculatus* might be used for  
34 the introduction of new tolerant traits to combined stresses, in other *Lotus* species used as  
35 forage.

36

37 **Key words:** Legumes; Flooding; Forage; Ion Transporters;  
38 Compartmentalization.

39

40

41

## 42        **1. Introduction**

43            Human agriculture is facing one of its most important challenges due to an increase  
44 in food demand and the more severe consequences of global climate change (Thornton et  
45 al., 2014). Under these circumstances, the decrease in biological diversity and widespread  
46 monoculture add more uncertainties to the problem (Nunez et al., 2019). In this context,  
47 discovering new germplasm adapted to restrictive soils or environments will be of  
48 fundamental importance, allowing the introduction of new valuable traits to the existing  
49 crop species.

50            Within climate change consequences, global warming alters the precipitations  
51 regime, increasing the frequency of flooding and drought events worldwide (Hirabayashi et  
52 al., 2013). This phenomenon, together with the sea-level rise in coastal areas (Carter et al.,  
53 2006; Martin et al., 2011) and the expansion of high sodicity soils (Ghassemi et al., 1995;  
54 Lavado and Taboada, 1987), also increase the frequency of combined waterlogging-saline  
55 stress events (Bennett et al., 2009).

56            The effects of waterlogging and salinity stress have been extensively studied in  
57 different plant species. Waterlogging limits oxygen diffusion in the rhizosphere (Armstrong  
58 and Drew, 2002; Ponnampereuma, 1984), compromises mitochondrial respiration in roots  
59 (Gupta et al., 2009; Zabalza et al., 2009) and leads to an ATP production failure for energy  
60 demanding processes (Bailey-Serres and Voesenek, 2008; Geigenberger, 2003). Thus, plant  
61 responses to waterlogging involve anatomical and morphological changes, such as  
62 aerenchyma formation and development of adventitious roots, which aim to increase root  
63 oxygenation (Colmer and Voesenek, 2009; McDonald et al., 2002). In particular, in the *Lotus*  
64 genus, aerenchyma formation was shown to correlate with flooding tolerance in several  
65 species (Antonelli et al., 2019; revised by Striker and Colmer, 2017).

66            Regarding salinity, salt causes osmotic stress and ionic toxicity in most crop plants  
67 (Blumwald, 2000; Munns, 2002). Firstly, the osmotic stress occurs as a consequence of the  
68 decrease of water availability in roots due to the increase in ion concentration in the soil.  
69 Ion toxicity takes place in a second phase, and is caused when  $\text{Na}^+$  and/or  $\text{Cl}^-$  are  
70 accumulated in leaves, disrupting protein structure, organelles and affecting cell  
71 metabolism (reviewed by Munns and Tester, 2008). While the osmotic stress effect is  
72 immediate, the effect due to ionic toxicity is observed after longer exposure time (days or

73 weeks) (Munns, 2002). In addition, salinity may cause nutrient deficiencies or imbalances,  
74 due to the competition of  $\text{Na}^+$  and  $\text{Cl}^-$  with nutrients such as  $\text{K}^+$ ,  $\text{Ca}^{2+}$  and  $\text{NO}_3^-$  (Hu and  
75 Schmidhalter, 2005).

76 Plants present different strategies to respond to salinity, such as ion exclusion or  
77 compartmentalization mechanisms (Munns and Tester, 2008; Teakle and Tyerman, 2010). In  
78 the case of the ion exclusion, these mechanisms can be achieved by exclusion transporters,  
79 which avoid the entrance of toxic ions into root cells. By contrast, in the  
80 compartmentalization mechanisms, ions are accumulated in sub-compartments within the  
81 plant cells, avoiding toxic levels to be reached in the cytoplasm and maintaining ionic  
82 homeostasis (Munns and Tester, 2008; Teakle and Tyerman, 2010). In both cases, the active  
83 transport of ions, with ATP consumption, is required (Munns and Tester, 2008; Teakle and  
84 Tyerman, 2010).

85 When waterlogging occurs together with salinity, the combined effects are larger  
86 than the additive effects of both stresses separately (Barrett-Lennard, 2003; Teakle et al.,  
87 2010). For instance, the energy deficit caused by waterlogging-induced hypoxia will have a  
88 direct impact on the  $\text{Na}^+$  transporters (Byrt et al., 2007; James et al., 2006), the  $\text{Na}^+/\text{H}^+$   
89 antiporters in the plasma membrane (Martínez-Atienza et al., 2007), and/or the  $\text{Na}^+/\text{H}^+$   
90 antiporters of the tonoplast (like *NHX1*; reviewed by Pardo et al., 2006; Xue et al., 2004). In  
91 this sense, it was reported that combined stress largely increases the concentrations of  $\text{Na}^+$   
92 and  $\text{Cl}^-$  in plant shoots, as compared with salinity stress alone (Barrett-Lennard, 2003;  
93 Barrett-Lennard and Shabala, 2013).

94 Between the regions affected by combined waterlogging-saline stress events, it is  
95 possible to mention the Flooding Pampa (Argentina). This area comprises approximately 9  
96 million hectares, being one of the most important cattle rearing area in South America  
97 (Soriano et al., 1991). Its soil is characterized by a poor nutrient availability, high clay  
98 content, salinity and alkalinity. Its frequent exposure to flooding periods, makes the  
99 Flooding Pampa a very restrictive environment for crops growth and forage production. As a  
100 consequence, the main forage source for cattle bearing consists of natural grasses which are  
101 reduced in protein content (Perelman et al., 2001).

102 Different strategies to improve forage quality traits are carried out in regions like the  
103 Flooding Pampa, using plant species adapted to constrain conditions. Within them, the use  
104 of species of the *Lotus* genus is in the spotlight due to its high plasticity and nutritional

105 value, being relevant forage alternative in South America, Australia and Europe (Blumenthal  
106 and McGraw, 1999; Escaray et al., 2012). In particular, *L. corniculatus* has been extensively  
107 used due to its moderate level of proanthocyanidins (PA), which contributes positively to  
108 nutritional quality of ruminant diet, increasing protein fraction assimilation, avoiding cattle  
109 bloat and reducing intestinal parasites (Foo et al., 1996; McNabb et al., 1996; Min et al.,  
110 2003). Nevertheless, the extended use of commercial cultivars of *L. corniculatus* (all  
111 tetraploids) has failed due to its edaphic requirements and its susceptibility to different  
112 stress conditions such as flooding or salinity (Antonelli et al., 2019; Escaray et al., 2019). By  
113 contrast, *L. tenuis* developed a relatively greater tolerance to waterlogging and salinity  
114 conditions (revised by Striker and Colmer, 2017), becoming naturalized in the Flooding  
115 Pampa. This species presents forage quality comparable to that of other forage legumes  
116 (such as *Medicago spp.* or *Trifolium spp.*). However, the low productivity of *L. tenuis* and its  
117 PA absence at foliar level, make of *L. corniculatus* a better forage species (revised by Escaray  
118 et al., 2012).

119         Recently, a new *L. corniculatus* accession has been collected from an alkaline-salty  
120 area, in the Valencia Albufera in Spain (Escaray et al., 2014). This population is diploid and  
121 has been used to improve *Lotus* cultivars through inter-specific hybridization. Although this  
122 new germplasm was tested under waterlogging stress (Antonelli et al., 2019) and salinity  
123 (Escaray et al., 2019), its stress response under combined waterlogging-saline stress was not  
124 yet evaluated. In the present study, we aimed to compare the response to waterlogging,  
125 salinity and combined waterlogging-saline stress of the diploid accession of *L. corniculatus*  
126 (described by Escaray et al., 2014) and one of the most common *L. corniculatus* cultivars  
127 used as forage production in South America (*L. corniculatus* cv. San Gabriel). Due to its  
128 environmental niche, we hypothesize that the diploid accession would show a better  
129 adaptation to combined waterlogging-saline stress than the commercial *L. corniculatus*  
130 cultivar.

131

## 132         **2. Materials and Methods**

### 133         **2.1 Plant material**

134         The *L. corniculatus* diploid accession (LcD) corresponds to a wild population collected  
135 at the Devesa de El Saler, Valencia (Spain). The taxonomical identity of this population as

136 belonging to *L. corniculatus* was established and confirmed by different authors (Ballester  
137 Ramírez de Arellano, 2015; Escaray et al., 2014). *L. corniculatus* commercial cv. San Gabriel  
138 (LcT) is a germplasm obtained by INIA (Instituto de Investigación Agropecuaria de Uruguay,  
139 Uruguay).

140

## 141 **2.2 Experimental design and growth conditions.**

142 A completely randomized design was performed and the two mentioned plant  
143 materials were evaluated under four treatments: 1- control treatment, plants were irrigated  
144 with nutrient solution and free drainage (Ctrl); 2- waterlogging with nutrient solution,  
145 keeping the water column 3 cm above the pot substrate surface without drainage (WL); 3-  
146 salinity, nutrient solution with 150 mM of NaCl and free drainage (NaCl); and 4- combined  
147 waterlogging-saline, a combination of the two last treatments (no drainage) (WL+NaCl).

148 Experiments were initiated from seeds, which were scarified with concentrated  
149 sulfuric acid (98%) during 3 min, washed ten times with sterile distilled water and sown in  
150 Petri dishes containing water-agar (0.8%). Plates were incubated for 7 days in a growth  
151 chamber, with a 16/8 h photoperiod at  $24/21 \pm 2^\circ\text{C}$  (day/night) and  $55/65 \pm 5\%$  relative  
152 humidity. Light intensity ( $250 \mu\text{mol photons m}^{-2} \text{s}^{-1}$ ) was provided by GroLux fluorescent  
153 lamps (F 40W). Seedlings at the full expanded cotyledon stage were transferred to  $300 \text{ cm}^3$   
154 pots, containing a mixture of washed sand-perlite (1:1 V/V), and irrigated as explained  
155 above. An individual plant per pot was considered an experimental unit. After 21 days of  
156 growing, when plants showed five fully-developed leaves, the stress treatments were  
157 initiated. Irrigation was performed throughout the experiment with a modified 0.5 x  
158 Hoagland's nutrient solution (Hoagland and Arnon, 1950) containing 3 mM  $\text{KNO}_3$ ; 2 mM  
159  $\text{Ca}(\text{NO}_3)_2 \cdot 4\text{H}_2\text{O}$ ; 1 mM  $\text{MgSO}_4 \cdot 7\text{H}_2\text{O}$ ; 0.5 mM  $\text{NH}_4\text{H}_2\text{PO}_4$ ; 50  $\mu\text{M}$   $\text{NaFeO}_8\text{EDTA} \cdot 2\text{H}_2\text{O}$ ; 4.5  $\mu\text{M}$   
160  $\text{MnCl}_2$ , 23  $\mu\text{M}$   $\text{H}_3\text{BO}_3$ , 0.16  $\mu\text{M}$   $\text{CuSO}_4 \cdot 5\text{H}_2\text{O}$ , 0.09  $\mu\text{M}$   $\text{ZnSO}_4 \cdot 7\text{H}_2\text{O}$ , and 0.06  $\mu\text{M}$   
161  $\text{Na}_2\text{MoO}_4 \cdot 2\text{H}_2\text{O}$ .

162

## 163 **2.3 Stress treatments**

164 In order to avoid any osmotic shock in saline and combined waterlogging-saline  
165 treatments, plants were treated with increasing concentration of NaCl (starting from 25 mM  
166 and reaching a final concentration of 150 mM) during 12 days (acclimation period). Overall,  
167 plants were subjected to NaCl during 33 days. In all pots subjected to waterlogging, nutrient

168 solution containing 0.1% (w/v) agar was bubbled with N<sub>2</sub> gas before irrigation. This  
169 procedure lowers the dissolved O<sub>2</sub> levels to less than approximately 10% of air-saturated  
170 solution (Gibbs and Greenway, 2003), whereas the dilute agar prevents convective  
171 movements in the solution (Wiengweera et al., 1997). There were five pots per treatment (n  
172 = 5), and the experiments were repeated at least once. Data shown corresponds to the most  
173 representative experiment.

174

#### 175 **2.4 Plant growth measurement**

176 At harvest, plant tissues were divided in young leaves (upper 2 fully expanded  
177 leaves), old leaves, stems and roots, and their dry matter was determined after drying at  
178 60°C, until constant weight. By adding the weight of different tissues, total dry weight and  
179 the shoot:root ratio were calculated.

180

#### 181 **2.5 Photosynthesis measurements**

182 One day before harvest, net photosynthetic rate at light saturation (Asat) was  
183 measured on the second apical fully expanded leaf (1500 μmol photons m<sup>-2</sup> s<sup>-1</sup> illumination,  
184 LED light), using a portable photosynthesis system (TPS-2 Portable Photosynthesis System,  
185 MA, USA). Then, net photosynthetic rate was relativized to leaf area. For this purpose,  
186 leaves were scanned and their area estimated using an image analyser program (Image Pro  
187 Plus 4.5). Non-invasive OJIP test (Strasser and Srivastava, 1995) was also performed on the  
188 second fully expanded leaf using a Pocket PEA Chlorophyll Fluorimeter (Hansatech  
189 Instruments, UK). Leaves were dark adapted for 20 min before analysis and then exposed  
190 for 3 s to light at an intensity of 3500 μmol m<sup>-2</sup> s<sup>-1</sup>. Data were processed by PEA Plus  
191 software (Hansatech Instruments, UK) and Windows Excel (Microsoft, WA, USA). The  
192 maximum quantum yield of primary photochemistry (Fv/Fm) was calculated.

193

#### 194 **2.6 Analytical determinations**

195 An aliquot of 10 mg of dried material was used to estimate the concentration of Na<sup>+</sup>  
196 and K<sup>+</sup> by standard flame photometry (Proehl and Nelson, 1950). Chloride was determined  
197 by a thiocyanate-Hg-based colorimetric reaction (Iwasaki et al., 1956). For this, 12.5 mg of  
198 powdered dry plant material was extracted in 0.5 mL of a solution containing H<sub>2</sub>O<sub>2</sub>  
199 (30%):concentrated HNO<sub>3</sub>:isoamyl alcohol:H<sub>2</sub>O at 1:1:0.08:7.9 (V/V). The extraction was

200 incubated at room temperature for 15 min, diluted to 5 mL with Milli-Q water and  
201 vigorously agitated in a Vortex. Then, 1.5 mL of the extraction mixture was centrifuged  
202 (10,000 rpm, 5 min) and the supernatant transferred to another tube. The colorimetric  
203 reaction solution contained polyethylene glycol dodecyl ether–water (Brij 35<sup>®</sup>, 4%):mercuric  
204 thiocyanate (4.17 g/L methanol):(NO<sub>3</sub>)<sub>3</sub>Fe (202 g/L Milli-Q water plus 21 mL concentrated  
205 HNO<sub>3</sub>):Milli-Q water at 0.05:15:15:70 (V/V). For treatments not involving NaCl, one millilitre  
206 of colorimetric reaction was added to 320 µL of the sample supernatant. For treatments  
207 that include NaCl, 50 µL of the supernatant were previously diluted with extraction solution  
208 to 320 µL. Sample absorbance was determined at 450 nm with a spectrophotometer  
209 (Hitachi U-1100), and interpolated into a KCl calibration curve (0, 5, 10, 15, 20 ppm).

210

## 211 **2.7 RNA isolation and cDNA synthesis**

212 Total RNA was extracted from frozen apical leaves using a Plant Spectrum Total RNA  
213 Kit (Sigma), according to the manufacturer’s instructions, and treated with DNase (TURBO  
214 DNA-free™ Kit, Ambion). The quality and quantity of RNA were verified by agarose gel  
215 electrophoresis and spectrophotometric analysis. The absence of DNA from the RNA  
216 samples was tested by the null PCR amplification of the universal rDNA primer pair  
217 ITS1/ITS4, as described in Paolucci et al (2006). Then, cDNA from *L. corniculatus* plants was  
218 synthesized from 3 µg of total RNA using a Moloney Murine Leukemia Virus Reverse  
219 Transcriptase (MMLV-RT) (Promega, WI, USA) and 100 pmol of random hexamers  
220 (Pharmacia Biotech), according to supplier’s instructions.

221

## 222 **2.8 Primer Design**

223 The cDNA sequences related to the *CLC* genes from *L. japonicus* and other model  
224 species were downloaded from GenBank. Using own transcriptomic information from *L.*  
225 *corniculatus* species (manuscript in preparation), an *in silico* analysis was performed to  
226 obtain a *CLC* homologous sequence for *L. corniculatus*. Deduced *CLC* sequences from *L.*  
227 *corniculatus* and *L. japonicus* were aligned with the BioEdit program (Hall, 1999). The most  
228 conserved nucleotide sequence between species was used to design the corresponding  
229 primers for qRT-PCR, by the software Primer3Plus ([http://www.bioinformatics.nl/cgi-](http://www.bioinformatics.nl/cgi-bin/primer3plus/primer3plus.cgi)  
230 [bin/primer3plus/primer3plus.cgi](http://www.bioinformatics.nl/cgi-bin/primer3plus/primer3plus.cgi)). Additionally, a primer pair reported by Teakle et al.



231 (2010) was used to evaluate the relative expression of the *NHX1* gene. In all cases, the *EF-1 $\alpha$*   
232 gene was used as housekeeping (Escaray et al., 2014).

233 The primer pairs were initially checked for their specificity and amplification  
234 efficiency in both *L. corniculatus* accessions. Only primer pairs that produced the expected  
235 amplicon and showed similar PCR efficiency were used in the present study. Primers used  
236 for qRT-PCR analysis are listed in Supplementary Table 1.

237

## 238 **2.9 Quantitative RT-PCR**

239 An aliquot of 5  $\mu$ L of 1:8 diluted cDNA was used in the qRT-PCR reactions, made  
240 using 15  $\mu$ L of the FastStart Universal SYBR-Green Master Mix (Rox, Roche) and 2.5 pmol of  
241 each primer, according to the supplier's instructions. Three biological replicates were  
242 performed per sample and gene. Cycling parameters were two initial steps of 50°C for 2 min  
243 and 95°C for 2 min, a two-step cycle of 95°C for 15 s and 60°C for 1 min repeated 50 times,  
244 and a final step of 10 min at 60°C. This was followed by the dissociation protocol.  
245 Amplifications were performed on Mx3005P qPCR System apparatus with the help of the  
246 MxPro qPCR Software 4.0 (Stratagene, La Jolla, CA, U.S.A.). For each transcript, the average  
247 threshold cycle (Ct) was determined. The gene quantification method was based on the  
248 relative expression of the target gene versus the reference *EF-1 $\alpha$*  gene, according to  
249 Paolucci et al. (2007).

250

## 251 **2.10 Statistical analysis**

252 The experimental results were analyzed using one-way ANOVA for each of the two  
253 accessions independently of each other, with four treatments (Ctrl, WL, NaCl and WL+NaCl),  
254 followed by Duncan's test ( $p < 0.05$ ). Previously, the assumptions of variance homogeneity  
255 and normality were tested for all variables with Levene's and Shapiro-Wilk, respectively. In  
256 the case of the analysis of the maximum quantum yield of PSII (Fv/Fm), a t-test was  
257 performed. In some cases, comparison between the accessions was also performed using a  
258 t-test analysis, for the determined growth variables and ion accumulation measurements.  
259 Statistical analysis of gene relative expression was performed based on the pairwise fixed  
260 reallocation randomization test ( $p < 0.05$ ) (Pfaffl et al., 2002). In all cases the Infostat  
261 software tool was used (Di Rienzo et al., 2010).

262

### 263 3. Results

#### 264 3.1 Effect of salt, waterlogging and combined waterlogging-saline stress on the growth of 265 the two *L. corniculatus* accessions

266 The stress treatments imposed visually affected both *L. corniculatus* accessions after  
267 20 days (12 d of salt acclimation plus 8 d of full treatments) (Figure 1). Effects of saline and  
268 waterlogging-saline treatments were more evident for LcT plants, for which a smaller  
269 number of stems and leaves was observed when compared to control. Similar symptoms  
270 were also observed for this accession under waterlogging, although this effect was less  
271 strong when compared to the other stress treatments. Regarding LcD, the stress treatments  
272 did not reduce the growth of the plants during the first week of the experiment.

273 After 33 d since the beginning of the experiment (12 d of salt acclimation plus 21 d of  
274 full treatments; harvest date), the phenotype of the plants subjected to the combined  
275 waterlogging-saline stress was markedly different between the studied accessions (Figure  
276 1), being LcT more severely affected than LcD. While dead leaves and chlorosis were clearly  
277 observed for LcT, none of these symptoms were registered for LcD. The phenotype of the  
278 others treatments followed the same trend observed for day 8 (not shown).

279 The effect of the different stress treatments on the growth of both *L. corniculatus*  
280 accessions can also be observed through their accumulated shoots and roots dry mass  
281 (Figure 2). Although the variability between biological replicates was larger for LcD than for  
282 LcT, no significant differences in shoots and roots dry mass accumulation were observed for  
283 LcD among stress treatments and its control (Figure 2A and C). By contrast, the stress  
284 treatments significantly reduced the shoots and roots dry mass of LcT. This effect was more  
285 pronounced in the combined stress treatment, when compared with the waterlogging and  
286 salinity conditions imposed independently. The dry mass reduction for LcT between the  
287 combined stress treatment and the control was of 75 % and 60 % for shoots and roots,  
288 respectively. It is worth mentioning that the total dry mass accumulation was higher for LcT  
289 than for LcD (t-test,  $p < 0.05$ ), in control, waterlogging and saline treatments (Figure 2B).  
290 However, under the combined stress treatment, both accessions accumulated similar  
291 amount of total dry mass (t-test,  $p > 0.05$ )

292 The shoot:root ratio was calculated in the different treatments, from the dry mass  
293 accumulated for each accession (Figure 2D and Supplementary Figure 1). An increased in  
294 this parameter was observed for both LcD and LcT as a response to waterlogging, when

295 compared to controls. By contrast, a decreased in shoot:root ratio was determined under  
296 salinity for both accessions. Regarding the combined stress treatment, a significant  
297 decreased compared to controls, was only observed for LcT.

298

### 299 **3.2 Photosynthetic response of the LcT and LcD accessions to the different stress** 300 **treatments.**

301 Net photosynthetic rate at saturating irradiance (Asat) and the maximum quantum  
302 yield of PSII (Fv/Fm) were measured in all plants one day before harvest date (Figure 3). The  
303 stomatal conductance (gs) was also measured in each case (Supplementary Figure 2). Asat  
304 values were only reduced for LcD under salt stress, while for LcT a decreased was observed  
305 in all the stress treatments. In LcT, the stronger effect was observed under the salt and the  
306 combined stress. Differences observed in gs were comparable to the ones showed by Asat.  
307 The larger reduction of gs was observed under the saline stress for both LcD and LcT.  
308 However, no effect was observed in gs in neither of the plant accessions under the  
309 waterlogging stress, when compared to controls. In the case of the combined stress  
310 treatment, the gs value decreased strongly for LcT, but not for LcD.

311 Regarding the Fv/Fm measurements, no differences were observed for LcD between  
312 the different treatments; meanwhile, the maximum yield of PSII was significantly reduced  
313 for the salt and combined stress condition in LcT, compared to its control (Figure 3B).  
314 Reduction of this parameter was more pronounced under the combined stress condition,  
315 reaching values lower than 0.8 (Figure 3B).

316

### 317 **3.3 Ions accumulation in different tissues of LcT and LcD subjected to stress conditions**

318 The concentration of Cl<sup>-</sup>, Na<sup>+</sup> and K<sup>+</sup> were measured in apical and basal leaves and in  
319 roots of LcT and LcD, at the end of the experiment (harvest date) (Figure 4A-I). The Na<sup>+</sup>/K<sup>+</sup>  
320 was also calculated as a salinity tolerance index, due to the fact that Na<sup>+</sup> can interfere with  
321 K<sup>+</sup> homeostasis, affecting several metabolic processes (Figure 4J-L) (Assaha et al., 2017;  
322 Shabala and Pottosin, 2014). Cl<sup>-</sup> and Na<sup>+</sup> concentrations were not altered in the  
323 waterlogging treatment when compared with controls. By contrast, in both *L. corniculatus*  
324 accessions, Cl<sup>-</sup> and Na<sup>+</sup> increased in the stress treatments where irrigation was  
325 supplemented with NaCl, both in leaves and roots (Figure 4A-I). Nevertheless, the ion  
326 accumulation in both fractions of leaves (young and old) was always higher than in roots,

327 showing that the ions were transported to shoots when plants were exposed to saline and  
328 waterlogging-saline stress.

329 For roots and basal leaves tissues, the increase in  $\text{Cl}^-$  and  $\text{Na}^+$  concentration was  
330 larger under the combined stress condition, when compared to salinity, in both *L.*  
331 *corniculatus* accessions. Interestingly,  $\text{Cl}^-$  accumulation in apical leaves of LcD was similar  
332 between saline and waterlogging-saline stress (Figure 4A). Nevertheless, in general, a similar  
333 pattern of ion accumulation was observed between apical and basal leaves of both LcT and  
334 LcD; although  $\text{Cl}^-$  and  $\text{Na}^+$  accumulation was higher for LcT, when compared to LcD, under  
335 the combined stress treatment (t-test,  $p < 0.05$ ).

336 Regarding the  $\text{K}^+$  concentration, a reduction in apical and basal leaves was observed  
337 in both saline and combined stress treatments, when compared with controls, for LcD.  
338 Meanwhile, a significant decrease was only measured under the waterlogging-saline  
339 treatment for LcT (Figure 4G and H). In the case of roots, salinity and waterlogging-saline  
340 stress reduced the concentration of  $\text{K}^+$  in similar proportions for LcD and LcT, compared with  
341 their respective controls (Figure 4I). If we consider the changes in both  $\text{K}^+$  and  $\text{Na}^+$   
342 concentrations, a decrease in  $\text{K}^+/\text{Na}^+$  ratio was also observed under the salt and combined  
343 stress conditions for both LcT and LcD, compared to controls (Figure 4J-L). No differences  
344 were observed for the  $\text{K}^+/\text{Na}^+$  ratio between the waterlogging stress and control treatments  
345 for LcD, neither in leaves nor roots, but differences were detected for LcT.

346

### 347 **3.4 Effect of stress treatments on the expression of *CLC* and *NHX1* genes.**

348 *CLC* and *NHX1* are genes coding for  $\text{Cl}^-$  and  $\text{Na}^+$  transporters, respectively, that have  
349 been reported to participate in ion homeostasis and salt stress tolerance in different plant  
350 species (Bao et al., 2014; Diédhiou and Gollack, 2006; Jossier et al., 2010; Nakamura et al.,  
351 2006; Teakle and Tyerman, 2010). The relative expression of both genes was measured on  
352 the most contrasting treatments (control and combined waterlogging-saline stress) for both  
353 LcD and LcT (Figure 5). The relative expression of *CLC* and *NHX1* was not affected by  
354 waterlogging-salt treatment in LcT plants (Figure 5A and B, respectively). Nevertheless, in  
355 the LcD accession, the *CLC* gene expression increased three-folds under the combined stress  
356 condition, when compared to its control (Figure 5A). Regarding the *NHX1* expression, an

357 increased expression trend was observed for LcD, although in this case the difference was  
358 not significant (Figure 5B).

359

#### 360 **4. Discussion**

361 In the present study, the stress tolerance of a recent described *L. corniculatus* diploid  
362 accession was addressed, with the hypothesis that, due to the characteristics of its  
363 ecological niche (Escaray et al., 2014), it would present a better performance under  
364 waterlogging-saline conditions than other *L. corniculatus* accession. The larger variability for  
365 LcD can be justified with the fact that it was collected from a natural population and did not  
366 go through a domestication process such as the commercial cultivar LcT (Escaray et al.,  
367 2014). It is worth mentioning that a high variability within individuals of the same  
368 population could be an advantage in the search of tolerant traits for forage breeding  
369 programs. In fact, the inter-specific hybridization of LcD with other species was already  
370 demonstrated to be a useful tool for improving forage legumes (Antonelli et al., 2019;  
371 Escaray et al., 2019, 2014).

372 As a general response, waterlogging stress significantly affected shoot and root dry  
373 mass accumulation and net photosynthetic rate in LcT, but did not cause a severe  
374 impairment in growth in neither of both accessions. The tolerance extent of *L. corniculatus*  
375 to waterlogging stress was previously described (Antonelli et al., 2019; Striker and Colmer,  
376 2017), and is related with the ability of aerenchyma and adventitious root formation. These  
377 traits allow O<sub>2</sub> supply and respiration, sustaining metabolism and growth rates under the  
378 hypoxic conditions imposed by the water submergence (Colmer and Voesenek, 2009;  
379 McDonald et al., 2002). Another common plant response to waterlogging is the higher  
380 relative partition of photosynthates to shoots than to roots, resulting in an increased  
381 shoot:root ratio (Mendoza et al., 2005; Rubio et al., 1995). This was observed for both LcT  
382 and LcD under the waterlogging stress treatment.

383 On the contrary, plants were severely affected under the saline stress treatments.  
384 This effect was more evident in the tetraploid accession, showing a decrease in its dry  
385 biomass accumulation and in the photosynthetic parameters evaluated. Both  
386 measurements are consistent, showing that a reduction in net photosynthetic rate has a  
387 significant impact in dry biomass accumulation. Salinity has been described as a two-phase

388 stress, where a first osmotic component affects plant growth, followed by a toxic phase due  
389 to the accumulation of toxic ions (Munns, 2002). Due to the salinity acclimation period that  
390 was imposed before the salinity treatments (see Materials and Methods), the osmotic phase  
391 was probably reduced and the decrease in the photosynthetic capacity of the plants could  
392 be attributed to the accumulation of toxic levels of ions. Nevertheless, although an increase  
393 in the concentration of  $\text{Cl}^-$  and  $\text{Na}^+$  was observed under salt stress in LcD and LcT, the  
394 maximum quantum yield of PSII was not severely affected under this condition. Similar  
395 results were reported in the halophyte *Suaeda salsa* (Lu et al., 2002), and for LcD under  
396 comparable saline stress conditions (Escaray et al., 2019).

397         Considering the decrease in stomatal conductivity, an osmotic effect due to salinity  
398 cannot be discarded, and the reduction in the photosynthetic capacity of both accessions  
399 could be also attributed to a lower  $\text{CO}_2$  availability. Similar results were observed in other  
400 species, where it was concluded that stomatal aperture was the main factor limiting leaf  
401 photosynthetic capacity in NaCl-treated plants (Loreto et al., 2003; Meloni et al., 2003). The  
402 lack of alterations in PSII functionality under salt stress might be the result of an increase in  
403 photoprotection mechanisms, such as Non-Photochemical Quenching and cyclic electron  
404 flow (Bencke-Malato et al., 2014; Dionisio-Sese and Tobita, 2000), or the increase in the  
405 activity of ROS scavenging mechanisms in the chloroplast (Badawi et al., 2004; Meloni et al.,  
406 2003). The latter was previously reported to take place in other *Lotus* species, although  
407 under low temperature conditions (Calzadilla et al., 2016).

408         Despite salinity similarly affected both *L. corniculatus* accessions, the larger  
409 contrasting response between accessions was observed under the combined stress  
410 treatment. This condition mainly affected LcT plants; while for LcD, unexpectedly,  
411 waterlogging seemed to reduce the negative effects caused by salinity (Figure 1). The better  
412 performance of LcD compared to LcT could be, at least partially, explained by a lower  
413 accumulation of  $\text{Cl}^-$  and  $\text{Na}^+$  ions in their leaves. Combined waterlogging-saline stress cause  
414 an increase in these ions concentrations when compared to salinity (Barrett-Lennard, 2003),  
415 which was, in general, more pronounced for LcT plants.

416         The saline stress tolerance has been correlated to the capacity of  $\text{Cl}^-$  exclusion in  
417 different legume species (Teakle and Tyerman, 2010), including some of the *Lotus* genus  
418 (Sanchez et al., 2010; Teakle et al., 2006). Moreover, the negative correlation between  $\text{Cl}^-$   
419 concentration and stress tolerance has been reported to be even stronger than the one

420 existing for  $\text{Na}^+$ , in *Trifolium* (Rogers et al., 1997), *Medicago* (Sibole et al., 2003), *Glycine*  
421 (Luo et al., 2005) and even *Lotus* (Teakle et al., 2007, 2006). Xu et al. (1999) defined critical  
422 values for  $\text{Cl}^-$  toxicity above  $200 \mu\text{mol.g}^{-1}\text{DM}$  for sensitive crops species, such as rice, wheat,  
423 alfalfa and peanut; and above  $1400 \mu\text{mol.g}^{-1}\text{DM}$  for the most tolerant ones, i.e. sugar beet  
424 and tomato. Under the combined stress condition, the values measured for LcT were twice  
425 as high as the one observed for LcD, although in both cases  $\text{Cl}^-$  concentration reached the  
426 levels defined as toxic (Xu et al., 1999). This toxic effect was clearly observed in the  
427 reduction of the maximum quantum yield of PSII in LcT, in the further reduction of dry  
428 biomass accumulation and in the appearance of chlorotic and senesced leaves in this  
429 accession.

430 By contrast, no symptoms of ion toxicity were observed in LcD under the  
431 waterlogging-saline treatment, despite the high levels of  $\text{Cl}^-$  concentration in leaves. Even  
432 more, surprisingly, a net photosynthetic rate increased was observed for this accession  
433 under the combined stress, when compared with the salinity treatment alone. Although it is  
434 known that waterlogging deepens the effects caused by salinity stress (Barrett-Lennard,  
435 2003; Bennett et al., 2009), similar results regarding the amelioration of salinity were  
436 recently reported in *Mentha aquatica* (Haddadi et al., 2016). These results were suggested to  
437 be the consequence of the priming of an antioxidant response, which could help to increase  
438 membrane stability and reduce the toxic effects of NaCl (Haddadi et al., 2016). However,  
439 further studies are needed to understand how photosynthesis acclimates to the combined  
440 stress condition.

441 The better tolerance of LcD to the combined stress condition could be explained  
442 through a better compartmentalization of toxic ions within the cells. Different subcellular  
443 compartmentalization mechanisms have been described in the plant response to saline  
444 stress (revised by Munns and Tester, 2008; Teakle and Tyerman, 2010), including the  
445 participation of ion transporters such as *CLC* and *NHX1*, for  $\text{Cl}^-$  and  $\text{Na}^+$  respectively (Bao et  
446 al., 2014; Jossier et al., 2010; Nakamura et al., 2006). In this sense, expression of *CLC* was  
447 strongly correlated with salinity tolerance in grapevine (Henderson et al., 2014), while  
448 overexpression of *NHX1* was demonstrated to enhance salt stress in *Arabidopsis* and even *L.*  
449 *corniculatus* (Liu et al., 2010; Sun et al., 2006). These transgenic plants showed a higher  $\text{Na}^+$   
450 accumulation in their tissues, but a higher photosynthetic capacity. The amelioration of the  
451 toxic effect of  $\text{Na}^+$  was ascribed to its compartmentalization into the vacuole (Liu et al.,

452 2010), which provides an efficient way to alleviate Na<sup>+</sup> excess in the cytosol, and helps  
453 keeping cellular turgence under stress (Flowers et al., 1977). Furthermore, overexpression  
454 of tonoplast related proteins was also recently associated with a higher tolerance to salinity  
455 due to ion compartmentalization in legumes, such as *L. corniculatus* (Bao et al., 2014) and  
456 *M. sativa* (Bao et al., 2016).

457 The gene expression of *CLC* and *NHX1* was measured in order to approach a possible  
458 mechanism of waterlogging-saline tolerance in both *L. corniculatus* accessions. The  
459 expression of *CLC* was significantly increased under stress in LcD, while a similar expression  
460 trend was also observed for *NHX1*; meanwhile, plants of LcT showed no effect in relative  
461 expression of both genes between treatments. Chloride channels are involved into  
462 intracellular compartmentalization of Cl<sup>-</sup>, sequestering this anion to prevent toxic levels in  
463 cytoplasm. Our results suggest that, in LcD, increasing the expression of *CLC* might favour  
464 the compartmentalization of Cl<sup>-</sup>, improving its waterlogging-saline stress response. A similar  
465 effect might be taking place for Na<sup>+</sup> and its transporter *NHX1*. In this sense, a previous work  
466 showed that *NHX1* is also involved in *L. tenuis* response to waterlogging-salinity stress, and  
467 that its expression levels can justify the better tolerance of *L. tenuis* when compared to *L.*  
468 *corniculatus* (commercial cv. San Gabriel) (Teakle et al., 2010). Nevertheless, in this case, the  
469 differences in *NHX1* expression between *L. tenuis* and *L. corniculatus* were shown in root  
470 tissues.

471 It is worth mentioning that the active transport of ions against their concentration  
472 gradient implies the consumption of energy (Colmer and Flowers, 2008; Munns and Tester,  
473 2008). Thus, the hypoxic condition imposed by flooding severely affects respiration, the  
474 production of ATP and, as a consequence, affects ions compartmentalization as a salinity  
475 stress response (Barrett-Lennard, 2003; Kotula et al., 2015). This is one of the reasons why a  
476 more severe effect of salinity is generally observed when is combined with waterlogging  
477 (Barrett-Lennard, 2003; Teakle et al., 2007). Wetland halophytes plants were reported to  
478 have a lower increase in Na<sup>+</sup> and Cl<sup>-</sup> ions due to a higher oxygenation of their roots (Colmer  
479 and Flowers, 2008). Interestingly, Antonelli et al. (2019) measured the response of different  
480 *Lotus* species to waterlogging stress, including the ones addressed in the present study, and  
481 found that LcD shows almost three times the percentage of root aerenchyma than LcT.  
482 These results could imply a better root oxygenation in the first mentioned accession, which  
483 would allow respiration and ATP generation under hypoxic conditions. The higher root



484 aerenchyma formation of LcD, when compared to LcT, could also justify its better response  
485 to the waterlogging-saline stress condition. Similar results were obtained for *L. tenuis*, when  
486 compared to LcT, by Teakle et al. (2007).

487         There is a general agreement that cytoplasmic high  $K^+/Na^+$  ratio is a good indicator of  
488 low salt damage and high salinity tolerance (Maathuis and Amtmann, 1999; Munns and  
489 Tester, 2008). The similar physicochemical characteristics between  $K^+$  and  $Na^+$  affect a wide  
490 range of metabolic processes, such as enzymatic reactions and protein synthesis, and  
491 maintaining the  $K^+/Na^+$  ratio under stress conditions is of key importance to maintain  $K^+$   
492 homeostasis (Almeida et al., 2017; Maathuis and Amtmann, 1999; Shabala and Cuin, 2008).  
493 However, it was previously reported that for halophytes and some glycophytes plants, the  
494  $K^+/Na^+$  ratio is not a good parameter to assess salinity tolerance (Colmer and Voeselek,  
495 2009).

496         Our results show that, in leaves, the  $K^+/Na^+$  was only reduced in LcD when the  
497 irrigation solution was supplemented with NaCl; while in LcT,  $K^+/Na^+$  was decreased in all of  
498 the stress treatments imposed. These results are in agreement with a better response of  
499 LcD to waterlogging, when compared to LcT (our own results; Antonelli et al., 2019).  
500 Nevertheless, for the salinity and combined stress treatments, the  $K^+/Na^+$  ratio values did  
501 not differ between the evaluated *Lotus* accessions. Thus, the  $K^+/Na^+$ , at least at tissue level,  
502 is not a strong indicator of salinity tolerance for species of the *Lotus* genus, in agreement  
503 with results obtained by other authors (Rejili et al., 2007).

504         Although salinity stress reduces  $K^+$  and increases  $Na^+$  concentration in plant tissues,  
505 this not necessarily implies changes in their cytoplasmic concentrations (Flowers et al.,  
506 2015). For instance, a significant proportion of  $K^+$  of the leaves is located in the vacuole and  
507 is responsible of keeping cell turgence (Andrés et al., 2014; Barragán et al., 2012). In certain  
508 plant species, such as *Mesembryanthemum cristallinum* and *Suaeda maritima* (and probably  
509 *Lotus*), the role of  $K^+$  could be replaced by  $Na^+$ , which would allow maintaining ion  
510 homeostasis in the cytosol (Kronzucker et al., 2013; Leigh and Wyn Jones, 1986). As a  
511 consequence, for plants with a high salinity response implying subcellular ion  
512 compartmentalization, changes in the  $K^+/Na^+$  ratio might not necessarily imply alteration in  
513  $K^+$  homeostasis and stress sensitivity.

514

## 515 **5. Conclusions**

516 In the present study, the stress tolerance to waterlogging, salinity and combined  
517 waterlogging-saline stress was evaluated in two accessions of *Lotus corniculatus*. Our results  
518 showed that the diploid accession, obtained from an environmental niche naturally affected  
519 by waterlogging and salinity, has a better response to all the stress conditions evaluated,  
520 when compared to LcT. This contrasting response was more evident under the combined  
521 stress treatment. A lower decrease in dry biomass accumulation and absence of stress  
522 symptoms were observed in treated LcD plants, when compared with LcT, which could be  
523 ascribe to a lower photoinhibitory effect and lower Cl<sup>-</sup> and Na<sup>+</sup> accumulation in leaves. In  
524 addition, the better response could be justified trough the triggering of ion subcellular  
525 compartmentalization mechanisms, which was suggested through the increased expression  
526 levels of the *CLC* and *NHX1* transporters genes. In this sense, we suggest that the K<sup>+</sup>/Na<sup>+</sup>  
527 ratio is not a good indicator of salinity tolerance in plants where ion compartmentalization  
528 responses take place. As a conclusion, the higher adaptability of the *L. corniculatus* diploid  
529 accession to combined waterlogging-saline stress was demonstrated when compared to  
530 another *L. corniculatus* commercial cultivar. Thus, the recently characterized *L. corniculatus*  
531 accession could be used to introduce new tolerant traits to waterlogging-saline stress, in  
532 other *Lotus* species commonly used as forage.

533

## 534 **Acknowledgements**

535 This work was supported by grants from the *Agencia Nacional de Promoción Científica y*  
536 *Tecnológica* (ANPCYT-Argentina)/FONCyT-PICTs 1560, 1612, 3648 and 3718 and *Consejo*  
537 *Nacional de Investigaciones Científicas y Técnicas* (CONICET-Argentina)/ PIP 0980. C.J.A. and  
538 P.I.C. and M.P.C were doctoral fellows, whereas F.J.E. and O.A.R. are members of the  
539 Research Career of CONICET.

540

## 541 **Authors contribution**

542 C.J.A. designed and performed all the experiments, and analyzed data; P.I.C. analyzed data;  
543 M.P.C performed some experiments and analyzed data; F.J.E design experiments and  
544 analyzed data; O.A.R. conceived the project, designed and supervised all the experiments.  
545 The article was written by O.A.R, C.J.A. and P.I.C.

## 546 **References**

- 547 Almeida, D.M., Oliveira, M.M., Saibo, N.J.M., 2017. Regulation of Na<sup>+</sup> and K<sup>+</sup> homeostasis in  
548 plants: towards improved salt stress tolerance in crop plants. *Genet. Mol. Biol.* 40, 326–  
549 345.
- 550 Andrés, Z., Pérez-Hormaeche, J., Leidi, E.O., Schlücking, K., Steinhorst, L., McLachlan, D.H.,  
551 Schumacher, K., Hetherington, A.M., Kudla, J., Cubero, B., 2014. Control of vacuolar  
552 dynamics and regulation of stomatal aperture by tonoplast potassium uptake. *Proc.*  
553 *Natl. Acad. Sci.* 111, E1806–E1814.
- 554 Antonelli, C.J., Calzadilla, P.I., Vilas, J.M., Campestre, M.P., Escaray, F.J., Ruiz, O.A., 2019.  
555 Physiological and anatomical traits associated with tolerance to long-term partial  
556 submergence stress in the Lotus genus: responses of forage species, a model and an  
557 interspecific hybrid. *J. Agron. Crop Sci.* 205, 65–76.
- 558 Armstrong, W., Drew, M.C., 2002. Root growth and metabolism under oxygen deficiency, in:  
559 *Plant Roots*. CRC Press, pp. 1139–1187.
- 560 Assaha, D.V.M., Ueda, A., Saneoka, H., Al-Yahyai, R., Yaish, M.W., 2017. The role of Na<sup>+</sup> and  
561 K<sup>+</sup> transporters in salt stress adaptation in glycophytes. *Front. Physiol.* 8, 509.
- 562 Badawi, G.H., Kawano, N., Yamauchi, Y., Shimada, E., Sasaki, R., Kubo, A., Tanaka, K., 2004.  
563 Over-expression of ascorbate peroxidase in tobacco chloroplasts enhances the  
564 tolerance to salt stress and water deficit. *Physiol. Plant.* 121, 231–238.
- 565 Bailey-Serres, J., Voesenek, L., 2008. Flooding stress: acclimations and genetic diversity.  
566 *Annu. Rev. Plant Biol.* 59, 313–339.
- 567 Ballester Ramírez de Arellano, J., 2015. Requisitos edáficos de algunas especies de interés  
568 especial de Las Malladas del Parque Natural de La Albufera.
- 569 Bao, A.-K., Wang, Y.-W., Xi, J.-J., Liu, C., Zhang, J.-L., Wang, S.-M., 2014. Co-expression of  
570 xerophyte *Zygophyllum xanthoxylum* ZxNHX and ZxVP1-1 enhances salt and drought  
571 tolerance in transgenic *Lotus corniculatus* by increasing cations accumulation. *Funct.*  
572 *plant Biol.* 41, 203–214.
- 573 Bao, A., Du, B., Touil, L., Kang, P., Wang, Q., Wang, S., 2016. Co-expression of tonoplast  
574 Cation/H<sup>+</sup> antiporter and H<sup>+</sup>-pyrophosphatase from xerophyte *Zygophyllum*  
575 *xanthoxylum* improves alfalfa plant growth under salinity, drought and field conditions.  
576 *Plant Biotechnol. J.* 14, 964–975.
- 577 Barragán, V., Leidi, E.O., Andrés, Z., Rubio, L., De Luca, A., Fernández, J.A., Cubero, B., Pardo,  
578 J.M., 2012. Ion exchangers NHX1 and NHX2 mediate active potassium uptake into  
579 vacuoles to regulate cell turgor and stomatal function in *Arabidopsis*. *Plant Cell* 24,  
580 1127–1142.
- 581 Barrett-Lennard, E.G., 2003. The interaction between waterlogging and salinity in higher  
582 plants: causes, consequences and implications. *Plant Soil* 253, 35–54.
- 583 Barrett-Lennard, E.G., Shabala, S.N., 2013. The waterlogging/salinity interaction in higher  
584 plants revisited—focusing on the hypoxia-induced disturbance to K<sup>+</sup> homeostasis.  
585 *Funct. Plant Biol.* 40, 872–882.

- 586 Bencke-Malato, M., Cabreira, C., Wiebke-Strohm, B., Bücken-Neto, L., Mancini, E., Osorio,  
587 M.B., Homrich, M.S., Turchetto-Zolet, A.C., De Carvalho, M.C., Stolf, R., Weber, R.L.,  
588 Westergaard, G., Castagnaro, A.P., Abdelnoor, R. V, Marcelino-Guimarães, F.C., Margis-  
589 Pinheiro, M., Bodanese-Zanettini, M.H., 2014. Genome-wide annotation of the soybean  
590 WRKY family and functional characterization of genes involved in response to  
591 *Phakopsora pachyrhizi* infection. *BMC Plant Biol.* 14, 236.  
592 <https://doi.org/10.1186/s12870-014-0236-0>
- 593 Bennett, S.J., Barrett-Lennard, E.G., Colmer, T.D., 2009. Salinity and waterlogging as  
594 constraints to saltland pasture production: a review. *Agric. Ecosyst. Environ.* 129, 349–  
595 360.
- 596 Blumenthal, M.J., McGraw, R.L., 1999. Lotus Adaptation, Use, and Management, in: *Trefoil:  
597 The Science and Technology of Lotus*, CSSA Special Publication SV - 28. Crop Science  
598 Society of America and American Society of Agronomy, Madison, WI, pp. 97–119.  
599 <https://doi.org/10.2135/cssaspecpub28.c6>
- 600 Blumwald, E., 2000. Sodium transport and salt tolerance in plants. *Curr. Opin. Cell Biol.* 12,  
601 431–434.
- 602 Byrt, C.S., Platten, J.D., Spielmeyer, W., James, R.A., Lagudah, E.S., Dennis, E.S., Tester, M.,  
603 Munns, R., 2007. HKT1; 5-like cation transporters linked to Na<sup>+</sup> exclusion loci in wheat,  
604 *Nax2* and *Kna1*. *Plant Physiol.* 143, 1918–1928.
- 605 Calzadilla, P.I., Signorelli, S., Escaray, F.J., Menéndez, A.B., Monza, J., Ruiz, O.A., Maiale, S.J.,  
606 2016. Photosynthetic responses mediate the adaptation of two *Lotus japonicus*  
607 ecotypes to low temperature. *Plant Sci.* 250.  
608 <https://doi.org/10.1016/j.plantsci.2016.06.003>
- 609 Carter, J.L., Colmer, T.D., Veneklaas, E.J., 2006. Variable tolerance of wetland tree species to  
610 combined salinity and waterlogging is related to regulation of ion uptake and  
611 production of organic solutes. *New Phytol.* 169, 123–134.
- 612 Colmer, T.D., Flowers, T.J., 2008. Flooding tolerance in halophytes. *New Phytol.* 179, 964–  
613 974.
- 614 Colmer, T.D., Voesenek, L., 2009. Flooding tolerance: suites of plant traits in variable  
615 environments. *Funct. Plant Biol.* 36, 665–681.
- 616 Di Rienzo, J.A., Casanoves, F., Balzarini, M.G., Gonzalez, L., Tablada, M., Robledo, C.W., 2010.  
617 *InfoStat* versión. Grup. InfoStat, FCA, Univ. Nac. Córdoba, Argentina.
- 618 Diédhiou, C.J., Gollmack, D., 2006. Salt-dependent regulation of chloride channel transcripts  
619 in rice. *Plant Sci.* 170, 793–800.
- 620 Dionisio-Sese, M.L., Tobita, S., 2000. Effects of salinity on sodium content and  
621 photosynthetic responses of rice seedlings differing in salt tolerance. *J. Plant Physiol.*  
622 157, 54–58.
- 623 Escaray, F.J., Antonelli, C.J., Carrasco, P., Ruiz, O.A., 2019. Interspecific hybridization  
624 improves the performance of *Lotus* spp. under saline stress. *Plant Sci.* 283, 202–210.
- 625 Escaray, F.J., Menendez, A.B., Gárriz, A., Pieckenstain, F.L., Estrella, M.J., Castagno, L.N.,

- 626 Carrasco, P., Sanjuán, J., Ruiz, O.A., 2012. Ecological and agronomic importance of the  
627 plant genus *Lotus*. Its application in grassland sustainability and the amelioration of  
628 constrained and contaminated soils. *Plant Sci.* 182, 121–133.
- 629 Escaray, F.J., Passeri, V., Babuin, F.M., Marco, F., Carrasco, P., Damiani, F., Pieckenstain, F.L.,  
630 Paolocci, F., Ruiz, O.A., 2014. *Lotus tenuis* x *L. corniculatus* interspecific hybridization as  
631 a means to breed bloat-safe pastures and gain insight into the genetic control of  
632 proanthocyanidin biosynthesis in legumes. *BMC Plant Biol.* 14, 1.
- 633 Flowers, T.J., Munns, R., Colmer, T.D., 2015. Sodium chloride toxicity and the cellular basis  
634 of salt tolerance in halophytes. *Ann. Bot.* 115, 419–431.
- 635 Flowers, T.J., Troke, P.F., Yeo, A.R., 1977. The mechanism of salt tolerance in halophytes.  
636 *Annu. Rev. Plant Physiol.* 28, 89–121.
- 637 Foo, L.Y., Newman, R., Waghorn, G., McNabb, W.C., Ulyatt, M.J., 1996. Proanthocyanidins  
638 from *Lotus corniculatus*. *Phytochemistry* 41, 617–624.
- 639 Geigenberger, P., 2003. Response of plant metabolism to too little oxygen. *Curr. Opin. Plant*  
640 *Biol.* 6, 247–256.
- 641 Ghassemi, F., Jakeman, A.J., Nix, H.A., 1995. Salinisation of land and water resources: human  
642 causes, extent, management and case studies. CAB international.
- 643 Gibbs, J., Greenway, H., 2003. Mechanisms of anoxia tolerance in plants. I. Growth, survival  
644 and anaerobic catabolism. *Funct. Plant Biol.* 30, 1–47.
- 645 Gupta, K.J., Zabalza, A., Van Dongen, J.T., 2009. Regulation of respiration when the oxygen  
646 availability changes. *Physiol. Plant.* 137, 383–391.
- 647 Haddadi, B.S., Hassanpour, H., Niknam, V., 2016. Effect of salinity and waterlogging on  
648 growth, anatomical and antioxidative responses in *Mentha aquatica* L. *Acta Physiol.*  
649 *Plant.* 38, 119.
- 650 Hall, T.A., 1999. BioEdit: a user-friendly biological sequence alignment editor and analysis  
651 program for Windows 95/98/NT, in: *Nucleic Acids Symposium Series*. [London]:  
652 Information Retrieval Ltd., c1979-c2000., pp. 95–98.
- 653 Henderson, S.W., Baumann, U., Blackmore, D.H., Walker, A.R., Walker, R.R., Gilliam, M.,  
654 2014. Shoot chloride exclusion and salt tolerance in grapevine is associated with  
655 differential ion transporter expression in roots. *BMC Plant Biol.* 14, 273.
- 656 Hirabayashi, Y., Mahendran, R., Koirala, S., Konoshima, L., Yamazaki, D., Watanabe, S., Kim,  
657 H., Kanae, S., 2013. Global flood risk under climate change. *Nat. Clim. Chang.* 3, 816–  
658 821.
- 659 Hoagland, D.R., Arnon, D.I., 1950. The water-culture method for growing plants without soil.  
660 *Circ. Calif. Agric. Exp. Stn.* 347.
- 661 Hu, Y., Schmidhalter, U., 2005. Drought and salinity: a comparison of their effects on mineral  
662 nutrition of plants. *J. Plant Nutr. Soil Sci.* 168, 541–549.
- 663 Iwasaki, I., Utsumi, S., Hagino, K., Ozawa, T., 1956. A new spectrophotometric method for  
664 the determination of small amounts of chloride using the mercuric thiocyanate

- 665 method. Bull. Chem. Soc. Jpn. 29, 860–864.
- 666 James, R.A., Davenport, R.J., Munns, R., 2006. Physiological characterization of two genes  
667 for Na<sup>+</sup> exclusion in durum wheat, Nax1 and Nax2. *Plant Physiol.* 142, 1537–1547.
- 668 Jossier, M., Kroniewicz, L., Dalmas, F., Le Thiec, D., Ephritikhine, G., Thomine, S.,  
669 Barbier-Brygoo, H., Vavasseur, A., Filleur, S., Leonhardt, N., 2010. The Arabidopsis  
670 vacuolar anion transporter, AtCLCc, is involved in the regulation of stomatal  
671 movements and contributes to salt tolerance. *Plant J.* 64, 563–576.
- 672 Kotula, L., Clode, P.L., Striker, G.G., Pedersen, O., Läuchli, A., Shabala, S., Colmer, T.D., 2015.  
673 Oxygen deficiency and salinity affect cell-specific ion concentrations in adventitious  
674 roots of barley (*Hordeum vulgare*). *New Phytol.* 208, 1114–1125.
- 675 Kronzucker, H.J., Coskun, D., Schulze, L.M., Wong, J.R., Britto, D.T., 2013. Sodium as nutrient  
676 and toxicant. *Plant Soil* 369, 1–23.
- 677 Lavado, R.S., Taboada, M.A., 1987. Soil salinization as an effect of grazing in a native  
678 grassland soil in the Flooding Pampa of Argentina. *Soil Use Manag.* 3, 143–148.
- 679 Leigh, R.A., Wyn Jones, R.G., 1986. Cellular compartmentation in plant nutrition: the  
680 selective cytoplasm and the promiscuous vacuole. *Adv. plant Nutr.*
- 681 Liu, P., Yang, G.-D., Li, H., Zheng, C.-C., Wu, C.-A., 2010. Overexpression of NHX1s in  
682 transgenic Arabidopsis enhances photoprotection capacity in high salinity and drought  
683 conditions. *Acta Physiol. Plant.* 32, 81–90.
- 684 Loreto, F., Centritto, M., Chartzoulakis, K., 2003. Photosynthetic limitations in olive cultivars  
685 with different sensitivity to salt stress. *Plant. Cell Environ.* 26, 595–601.
- 686 Lu, C., Qiu, N., Lu, Q., Wang, B., Kuang, T., 2002. Does salt stress lead to increased  
687 susceptibility of photosystem II to photoinhibition and changes in photosynthetic  
688 pigment composition in halophyte *Suaeda salsa* grown outdoors? *Plant Sci.* 163, 1063–  
689 1068.
- 690 Luo, Q., Yu, B., Liu, Y., 2005. Differential sensitivity to chloride and sodium ions in seedlings  
691 of *Glycine max* and *G. soja* under NaCl stress. *J. Plant Physiol.* 162, 1003–1012.
- 692 Maathuis, F.J.M., Amtmann, A., 1999. K<sup>+</sup> nutrition and Na<sup>+</sup> toxicity: the basis of cellular  
693 K<sup>+</sup>/Na<sup>+</sup> ratios. *Ann. Bot.* 84, 123–133.
- 694 Martin, J., Fackler, P.L., Nichols, J.D., Lubow, B.C., Eaton, M.J., Runge, M.C., Stith, B.M.,  
695 Langtimm, C.A., 2011. Structured decision making as a proactive approach to dealing  
696 with sea level rise in Florida. *Clim. Change* 107, 185–202.
- 697 Martínez-Atienza, J., Jiang, X., Garcíadeblas, B., Mendoza, I., Zhu, J.-K., Pardo, J.M., Quintero,  
698 F.J., 2007. Conservation of the salt overly sensitive pathway in rice. *Plant Physiol.* 143,  
699 1001–1012.
- 700 McDonald, M.P., Galwey, N.W., Colmer, T.D., 2002. Similarity and diversity in adventitious  
701 root anatomy as related to root aeration among a range of wetland and dryland grass  
702 species. *Plant. Cell Environ.* 25, 441–451.
- 703 McNabb, W.C., Waghorn, G.C., Peters, J.S., Barry, T.N., 1996. The effect of condensed

- 704 tannins in *Lotus pedunculatus* on the solubilization and degradation of ribulose-1, 5-  
705 bisphosphate carboxylase (EC 4.1. 1.39; Rubisco) protein in the rumen and the sites of  
706 Rubisco digestion. *Br. J. Nutr.* 76, 535–549.
- 707 Meloni, D.A., Oliva, M.A., Martinez, C.A., Cambraia, J., 2003. Photosynthesis and activity of  
708 superoxide dismutase, peroxidase and glutathione reductase in cotton under salt  
709 stress. *Environ. Exp. Bot.* 49, 69–76.
- 710 Mendoza, R., Escudero, V., García, I., 2005. Plant growth, nutrient acquisition and  
711 mycorrhizal symbioses of a waterlogging tolerant legume (*Lotus glaber* Mill.) in a  
712 saline-sodic soil. *Plant Soil* 275, 305–315.
- 713 Min, B.R., Barry, T.N., Attwood, G.T., McNabb, W.C., 2003. The effect of condensed tannins  
714 on the nutrition and health of ruminants fed fresh temperate forages: a review. *Anim.*  
715 *Feed Sci. Technol.* 106, 3–19.
- 716 Munns, R., 2002. Comparative physiology of salt and water stress. *Plant. Cell Environ.* 25,  
717 239–250.
- 718 Munns, R., Tester, M., 2008. Mechanisms of salinity tolerance. *Annu. Rev. Plant Biol.* 59,  
719 651–681.
- 720 Nakamura, A., Fukuda, A., Sakai, S., Tanaka, Y., 2006. Molecular cloning, functional  
721 expression and subcellular localization of two putative vacuolar voltage-gated chloride  
722 channels in rice (*Oryza sativa* L.). *Plant Cell Physiol.* 47, 32–42.
- 723 Nunez, S., Arets, E., Alkemade, R., Verwer, C., Leemans, R., 2019. Assessing the impacts of  
724 climate change on biodiversity: is below 2° C enough? *Clim. Change* 154, 351–365.
- 725 Paolucci, F., Robbins, M.P., Madeo, L., Arcioni, S., Martens, S., Damiani, F., 2007. Ectopic  
726 expression of a basic helix-loop-helix gene transactivates parallel pathways of  
727 proanthocyanidin biosynthesis. structure, expression analysis, and genetic control of  
728 leucoanthocyanidin 4-reductase and anthocyanidin reductase genes in *Lotus cornicu.*  
729 *Plant Physiol.* 143, 504–516.
- 730 Paolucci, F., Rubini, A., Riccioni, C., Arcioni, S., 2006. Reevaluation of the life cycle of *Tuber*  
731 *magnatum*. *Appl. Environ. Microbiol.* 72, 2390–2393.
- 732 Pardo, J.M., Cubero, B., Leidi, E.O., Quintero, F.J., 2006. Alkali cation exchangers: roles in  
733 cellular homeostasis and stress tolerance. *J. Exp. Bot.* 57, 1181–1199.
- 734 Perelman, S.B., León, R.J.C., Oesterheld, M., 2001. Cross-scale vegetation patterns of  
735 Flooding Pampa grasslands. *J. Ecol.* 89, 562–577.
- 736 Pfaffl, M.W., Horgan, G.W., Dempfle, L., 2002. Relative expression software tool (REST©) for  
737 group-wise comparison and statistical analysis of relative expression results in real-time  
738 PCR. *Nucleic Acids Res.* 30, e36–e36.
- 739 Ponnamperna, F.N., 1984. Effects of flooding on soils. *Flooding and plant growth* 9–45.
- 740 Proehl, E.C., Nelson, W.P., 1950. The flame photometer in determination of sodium and  
741 potassium. *Am. J. Clin. Pathol.* 20, 806–813.
- 742 Rejili, M., Vadel, A.M., Guetet, A., Neffatti, M., 2007. Effect of NaCl on the growth and the

- 743 ionic balance  $K^+/Na^+$  of two populations of *Lotus creticus* (L.)(Papilionaceae). South  
744 African J. Bot. 73, 623–631.
- 745 Rogers, M.E., Noble, C.L., Halloran, G.M., Nicolas, M.E., 1997. Selecting for salt tolerance in  
746 white clover (*Trifolium repens*): chloride ion exclusion and its heritability. New Phytol.  
747 135, 645–654.
- 748 Rubio, G., Casasola, G., Lavado, R.S., 1995. Adaptations and biomass production of two  
749 grasses in response to waterlogging and soil nutrient enrichment. Oecologia 102, 102–  
750 105.
- 751 Sanchez, D.H., Szymanski, J., Erban, A., Udvardi, M.K., Kopka, J., 2010. Mining for robust  
752 transcriptional and metabolic responses to long-term salt stress: a case study on the  
753 model legume *Lotus japonicus*. Plant. Cell Environ. 33, 468–480.
- 754 Shabala, S., Cuin, T.A., 2008. Potassium transport and plant salt tolerance. Physiol. Plant.  
755 133, 651–669.
- 756 Shabala, S., Pottosin, I., 2014. Regulation of potassium transport in plants under hostile  
757 conditions: implications for abiotic and biotic stress tolerance. Physiol. Plant. 151, 257–  
758 279.
- 759 Sibole, J. V, Cabot, C., Poschenrieder, C., Barceló, J., 2003. Ion allocation in two different  
760 salt-tolerant Mediterranean *Medicago* species. J. Plant Physiol. 160, 1361–1365.
- 761 Soriano, A., León, R.J.C., Sala, O.E., Lavado, R.S., Deregibus, V.A., Cauhepe, M.A., Scaglia,  
762 O.A., Velázquez, C.A., Lemcoff, J.H., 1991. Río de la Plata Grasslands. In 'Ecosystems of  
763 the world 8A. Natural grasslands. Introduction and Western Hemisphere'.(Ed. RT  
764 Coupland) pp. 367–407.
- 765 Strasser, R.J., Srivastava, A., 1995. Polyphasic chlorophyll a fluorescence transient in plants  
766 and cyanobacteria\*. Photochem. Photobiol. 61, 32–42.
- 767 Striker, G.G., Colmer, T.D., 2017. Flooding tolerance of forage legumes. J. Exp. Bot. 68,  
768 1851–1872.
- 769 Sun, Y., Wang, D., Bai, Y., Wang, N., Wang, Y., 2006. Studies on the overexpression of the  
770 soybean *GmNHX1* in *Lotus corniculatus*: the reduced  $Na^+$  level is the basis of the  
771 increased salt tolerance. Chinese Sci. Bull. 51, 1306–1315.
- 772 Teakle, N.L., Amtmann, A., Real, D., Colmer, T.D., 2010. *Lotus tenuis* tolerates combined  
773 salinity and waterlogging: maintaining  $O_2$  transport to roots and expression of an  
774 *NHX1*-like gene contribute to regulation of  $Na^+$  transport. Physiol. Plant. 139, 358–374.
- 775 Teakle, N.L., Flowers, T.J., Real, D., Colmer, T.D., 2007. *Lotus tenuis* tolerates the interactive  
776 effects of salinity and waterlogging by 'excluding'  $Na^+$  and  $Cl^-$  from the xylem. J. Exp.  
777 Bot. 58, 2169–2180.
- 778 Teakle, N.L., Real, D., Colmer, T.D., 2006. Growth and ion relations in response to combined  
779 salinity and waterlogging in the perennial forage legumes *Lotus corniculatus* and *Lotus*  
780 *tenuis*. Plant Soil 289, 369.
- 781 Teakle, N.L., Tyerman, S.D., 2010. Mechanisms of  $Cl^-$  transport contributing to salt tolerance.



- 782 Plant. Cell Environ. 33, 566–589.
- 783 Thornton, P.K., Ericksen, P.J., Herrero, M., Challinor, A.J., 2014. Climate variability and  
784 vulnerability to climate change: a review. Glob. Chang. Biol. 20, 3313–3328.
- 785 Wiengweera, A., Greenway, H., Thomson, C.J., 1997. The use of agar nutrient solution to  
786 simulate lack of convection in waterlogged soils. Ann. Bot. 80, 115–123.
- 787 Xu, G., Magen, H., Tarchitzky, J., Kafkafi, U., 1999. Advances in chloride nutrition of plants,  
788 in: Advances in Agronomy. Elsevier, pp. 97–150.
- 789 Xue, Z.-Y., Zhi, D.-Y., Xue, G.-P., Zhang, H., Zhao, Y.-X., Xia, G.-M., 2004. Enhanced salt  
790 tolerance of transgenic wheat (*Triticum aestivum* L.) expressing a vacuolar Na<sup>+</sup>/H<sup>+</sup>  
791 antiporter gene with improved grain yields in saline soils in the field and a reduced  
792 level of leaf Na<sup>+</sup>. Plant Sci. 167, 849–859.
- 793 Zabalza, A., Van Dongen, J.T., Froehlich, A., Oliver, S.N., Faix, B., Gupta, K.J., Schmäzlin, E.,  
794 Igal, M., Orcaray, L., Royuela, M., 2009. Regulation of respiration and fermentation to  
795 control the plant internal oxygen concentration. Plant Physiol. 149, 1087–1098.

796

## 797 **Figure legends**

798 **Figure 1. Phenotypic characteristics of *L. corniculatus* accessions subjected to the different**  
799 **stress treatments.** Plants were subjected to the different treatments for 21 days, after the  
800 salinity acclimation period imposed for those treatments involving salt stress. Pictures were  
801 taken after 8 and 21 d (harvest). For the control and waterlogging (WL) treatments, plants  
802 were irrigated periodically with Hoagland solution 0.5 x with or without free drainage,  
803 respectively. In the salt treatment (NaCl) and combined stress treatment (WL+NaCl), plants  
804 were irrigated with Hoagland solution 0.5 x supplemented with 150 mM of NaCl with or  
805 without drainage, respectively. When waterlogging stress was imposed, nutritive solution  
806 was previously bubbled with N<sub>2</sub> (g) to reduce O<sub>2</sub> to hypoxic levels. LcD, diploid *L.*  
807 *corniculatus* accession; LcT, tetraploid *L. corniculatus* accession.

808

809 **Figure 2. Dry mass accumulation of *L. corniculatus* accessions subjected to the different**  
810 **stress treatments.** The measured shoots (A) and roots (C) dry mass are shown as percentage  
811 of the control dry mass in each case. (B) Total dry mass (g) accumulation at the end of the  
812 experiment. (D) Shoot:Root ratio was calculated from the dry mass accumulation of shoots  
813 and roots, respectively. Means ( $n = 5 \pm SD$ ) without common letters differ significantly  
814 within each of the accessions (one-way ANOVA; Duncan,  $p < 0.05$ ). White bars, control  
815 conditions (Ctrl); light gray bars, waterlogging stress (WL); dark gray bars, saline stress  
816 (NaCl); black bars, combined stress (WL+NaCl).

817

818 **Figure 3. Photosynthetic parameters of *L. corniculatus* accessions under the different**  
819 **stress treatments.** Net photosynthetic rate at saturating irradiance (Asat) (A) and the

820 maximum quantum yield of PSII (Fv/Fm) (B) were measured for five independent biological  
821 replicates ( $n = 5 \pm \text{SD}$ ). Means without common letters differ significantly within each of the  
822 accessions (one-way ANOVA; Duncan,  $p < 0.05$ ) (A). Asterisks show significant differences of  
823 a stress treatment against the control treatment (Student t-test, \*  $p < 0.05$ ; \*\*  $p < 0.01$ ) (B).  
824 White bars, control conditions (Ctrl); light gray bars, waterlogging stress (WL); dark gray  
825 bars, saline stress (NaCl); black bars, combined stress (WL+NaCl).

826

827 **Figure 4. Ions concentrations in apical and basal leaves, and in roots.** The concentration of  
828  $\text{Cl}^-$ ,  $\text{Na}^+$  and  $\text{K}^+$  ( $\mu\text{mol.g}^{-1}.\text{dry mass}^{-1}$ ) were measured in apical leaves (A, D and G), basal  
829 leaves (B, E and H) and in roots (C, F and I) of both *L. corniculatus* accessions under the  
830 different treatments ( $n = 5 \pm \text{SD}$ ). The  $\text{K}^+/\text{Na}^+$  ratio was calculated for apical and basal leaves  
831 (J and K, respectively), and for roots (L), in each case. Means without common letters differ  
832 significantly within each of the accessions (one-way ANOVA; Duncan,  $p < 0.05$ ). White bars,  
833 control conditions (Ctrl); light gray bars, waterlogging stress (WL); dark gray bars, saline  
834 stress (NaCl); black bars, combined stress (WL+NaCl).

835

836 **Figure 5. Relative expression of *CLC* (A) and *NHX1* (B) genes. The values represent the**  
837 **mean  $\pm$  SD ( $n = 3$ ).** Statistical analysis of relative expression was performed by comparing  
838 the relative expression of the genes based on the pairwise fixed reallocation randomization  
839 test ( $p < 0.05$ ). Asterisk show significant differences ( $p < 0.05$ ). White bars, control  
840 treatment (Ctrl); Black bars, combined stress (WL+NaCl).

841

## 842 **Supplementary material**

843 **Supplementary Figure 1. Shoots and roots dry mass accumulation of *L. corniculatus***  
844 **accessions subjected to the different stress treatments.** The measured shoots (A) and roots  
845 (B) dry mass is shown in grams ( $n = 5 \pm \text{SE}$ ). Means without common letters differ  
846 significantly within each of the accessions (one-way ANOVA; Duncan,  $p < 0.05$ ). White bars,  
847 control conditions (Ctrl); light gray bars waterlogging stress (WL); dark gray bars, saline  
848 stress (NaCl); black bars, combined stress (WL+NaCl).

849

850 **Supplementary Figure 2. Stomatal conductance of the *L. corniculatus* accessions under the**  
851 **different stress treatments.** The stomatal conductance was measured for five independent  
852 biological replicates ( $n = 5 \pm \text{SD}$ ). Means without common letters differ significantly within  
853 each of the accessions (one-way ANOVA; Duncan,  $p < 0.05$ ). White bars, control conditions  
854 (Ctrl); light gray bars waterlogging stress (WL); dark gray bars, saline stress (NaCl); black  
855 bars, combined stress (WL+NaCl).

856

857

858 **Supplementary Table 1.** Primers used for qRT-PCR.

| <b>Primer name</b>                 | <b>Sequence (5' -&gt; 3')</b> | <b>Reference</b>     |
|------------------------------------|-------------------------------|----------------------|
| <i>NHX1</i> -Fw                    | TACTTCACTGCGGTCCAATG          | Teakle et al., 2010  |
| <i>NHX1</i> -Rv                    | GATCTAGGGAAGCCATGCTG          | Teakle et al., 2010  |
| <i>CLC</i> -Fw                     | TTAGTTGGAATGGCCGCTAC          | Own design           |
| <i>CLC</i> -Rv                     | ACTGAGGGAACCCATATTGC          | Own design           |
| <i>EF-1<math>\alpha</math></i> -Fw | TGACAAGCGTGTGATCGAGAGG        | Escaray et al., 2014 |
| <i>EF-1<math>\alpha</math></i> -Rv | GATACCTCTTTCACGCTCAGCCTT      | Escaray et al., 2014 |

859

860

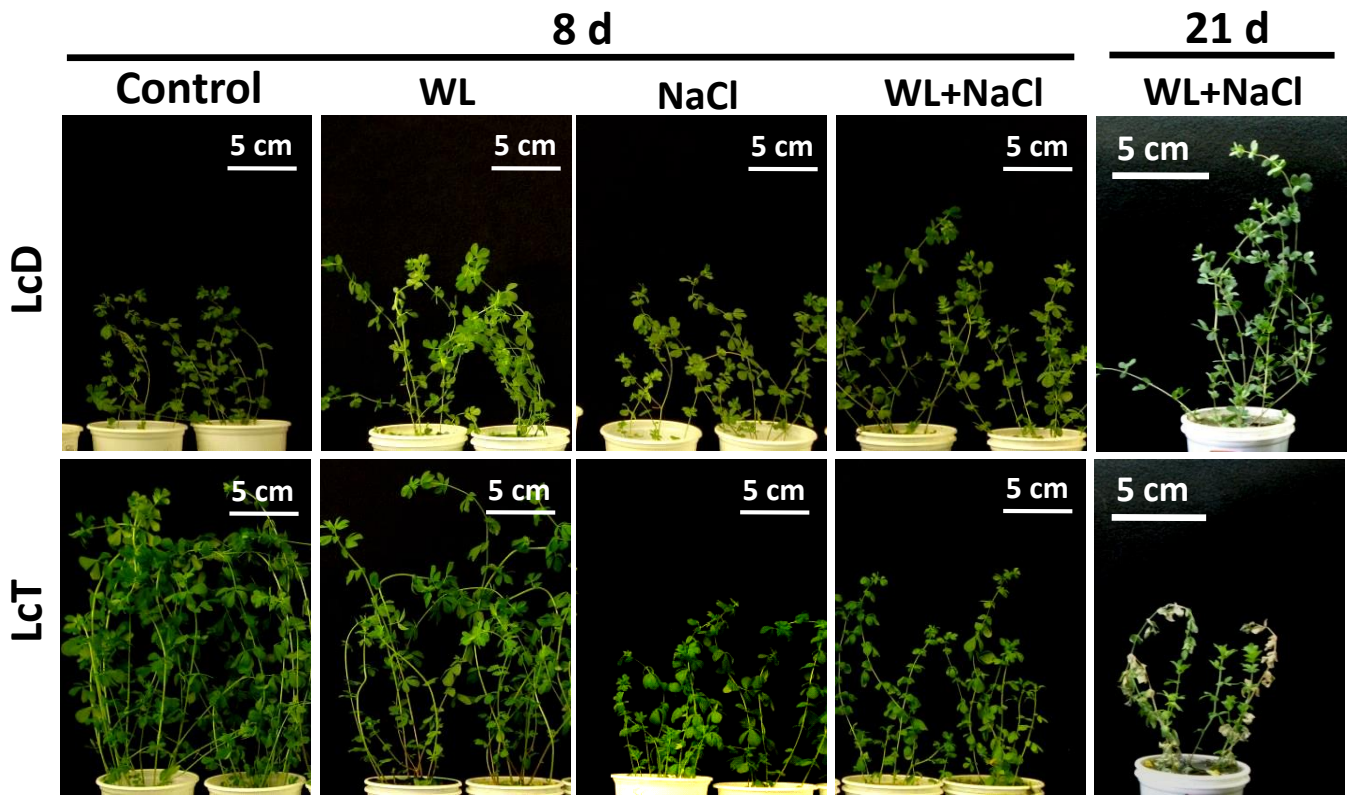

**Figure 1. Phenotypic characteristics of *L. corniculatus* accessions subjected to the different stress treatments.** Plants were subjected to the different treatments for 21 days, after the salinity acclimation period imposed for those treatments involving salt stress. Pictures were taken after 8 and 21 d (harvest). For the control and waterlogging (WL) treatments, plants were irrigated periodically with Hoagland solution 0.5 x with or without free drainage, respectively. In the salt treatment (NaCl) and combined stress treatment (WL+NaCl), plants were irrigated with Hoagland solution 0.5 x supplemented with 150 mM of NaCl with or without drainage, respectively. When waterlogging stress was imposed, nutritive solution was previously bubbled with N<sub>2</sub> (g) to reduce O<sub>2</sub> to hypoxic levels. LcD, diploid *L. corniculatus* accession; LcT, tetraploid *L. corniculatus* accession.

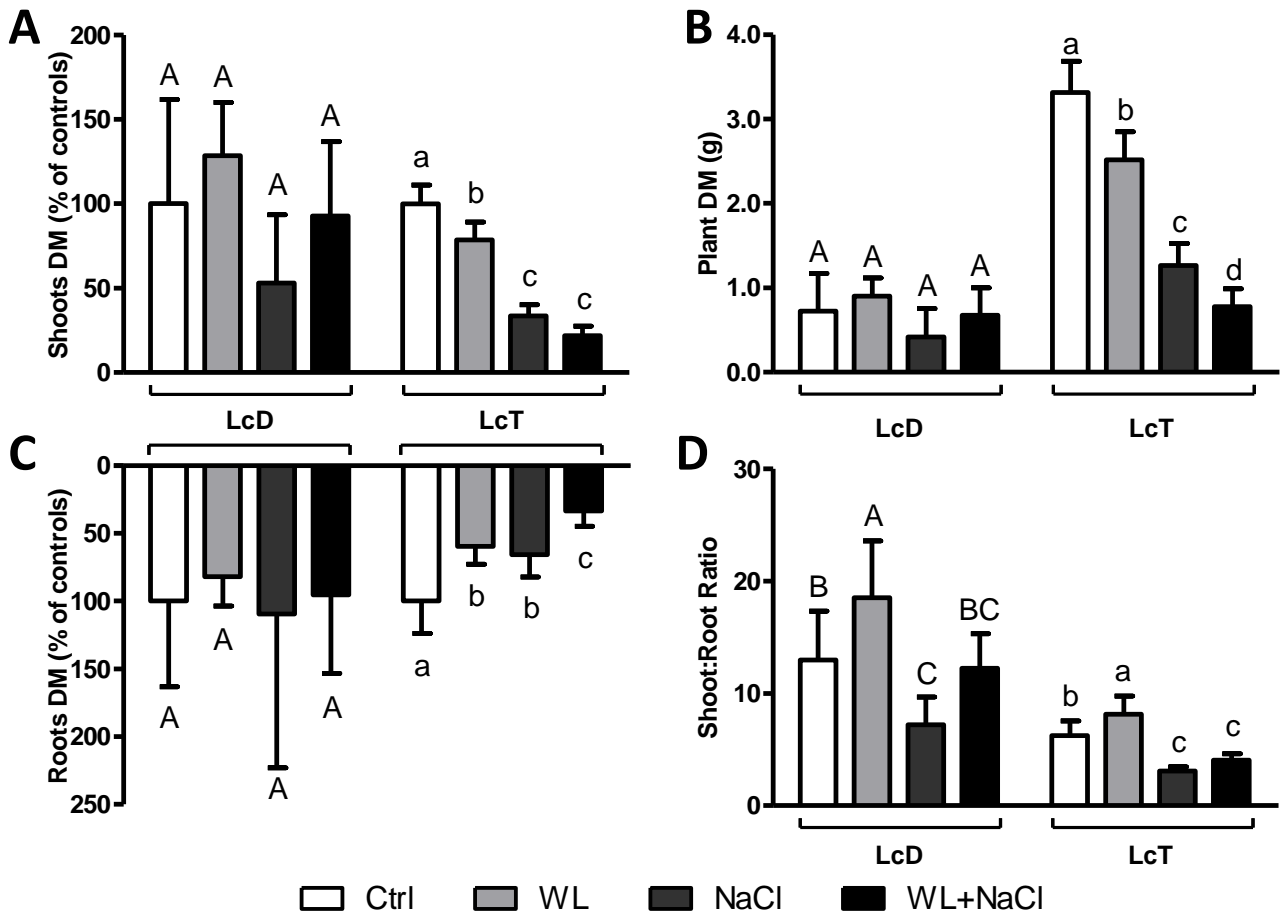

**Figure 2. Dry mass accumulation of *L. corniculatus* accessions subjected to the different stress treatments.** The measured shoots (A) and roots (C) dry mass are shown as percentage of the control dry mass in each case. (B) Total dry mass (g) accumulation at the end of the experiment. (D) Shoot:Root ratio was calculated from the dry mass accumulation of shoots and roots, respectively. Means ( $n = 5 \pm SD$ ) without common letters differ significantly within each of the accessions (one-way ANOVA; Duncan,  $p < 0.05$ ). White bars, control conditions (Ctrl); light gray bars, waterlogging stress (WL); dark gray bars, saline stress (NaCl); black bars, combined stress (WL+NaCl).

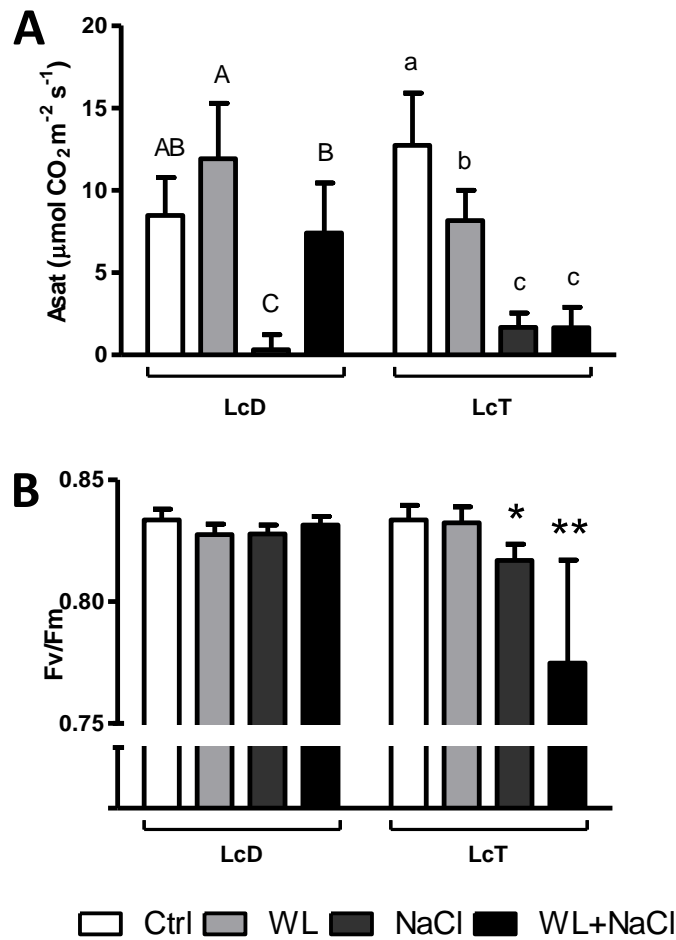

**Figure 3. Photosynthetic parameters of *L. corniculatus* accessions under the different stress treatments.** Net photosynthetic rate at saturating irradiance (Asat) (A) and the maximum quantum yield of PSII (Fv/Fm) (B) were measured for five independent biological replicates ( $n = 5 \pm SD$ ). Means without common letters differ significantly within each of the accessions (one-way ANOVA; Duncan,  $p < 0.05$ ) (A). Asterisks show significant differences of a stress treatment against the control treatment (Student t-test, \*  $p < 0.05$ ; \*\*  $p < 0.01$ ) (B). White bars, control conditions (Ctrl); light gray bars, waterlogging stress (WL); dark gray bars, saline stress (NaCl); black bars, combined stress (WL+NaCl).

## Leaves

## Roots

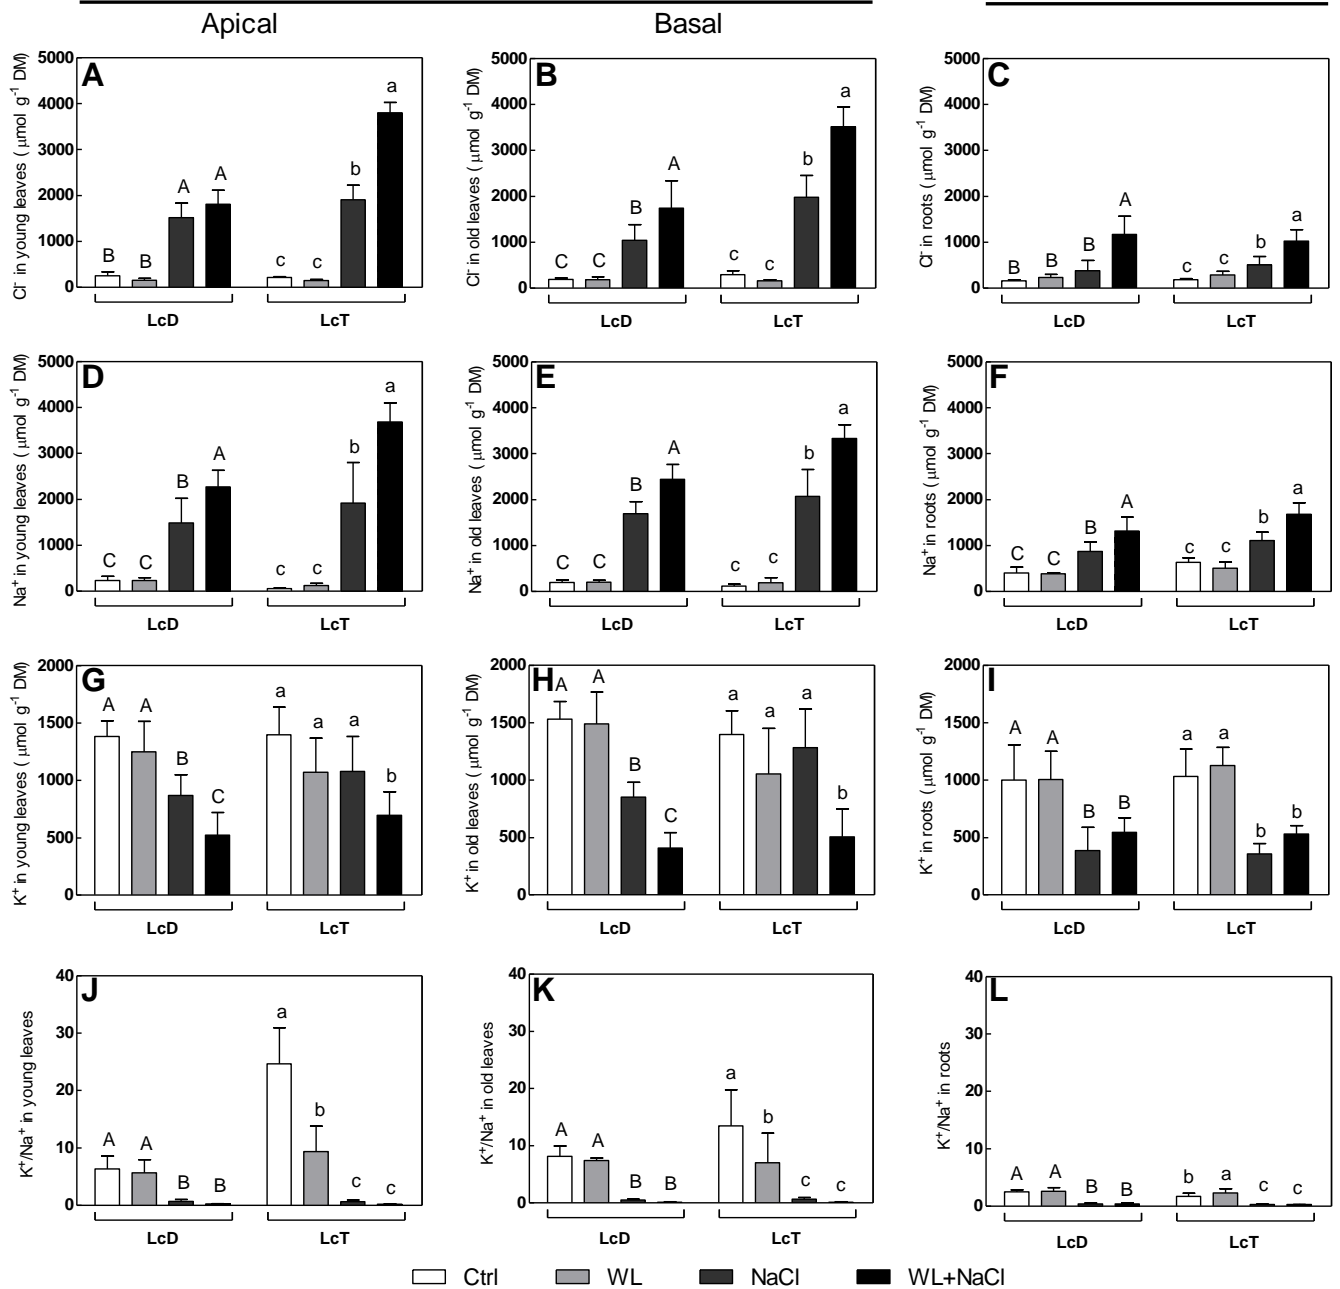

**Figure 4. Ions concentrations in apical and basal leaves, and in roots.** The concentration of Cl<sup>-</sup>, Na<sup>+</sup> and K<sup>+</sup> ( $\mu\text{mol}\cdot\text{g}^{-1}\cdot\text{dry mass}^{-1}$ ) were measured in apical leaves (A, D and G), basal leaves (B, E and H) and in roots (C, F and I) of both *L. corniculatus* accessions under the different treatments ( $n = 5 \pm \text{SD}$ ). The K<sup>+</sup>/Na<sup>+</sup> ratio was calculated for apical and basal leaves (J and K, respectively), and for roots (L), in each case. Means without common letters differ significantly within each of the accessions (one-way ANOVA; Duncan,  $p < 0.05$ ). White bars, control conditions (Ctrl); light gray bars, waterlogging stress (WL); dark gray bars, saline stress (NaCl); black bars, combined stress (WL+NaCl).

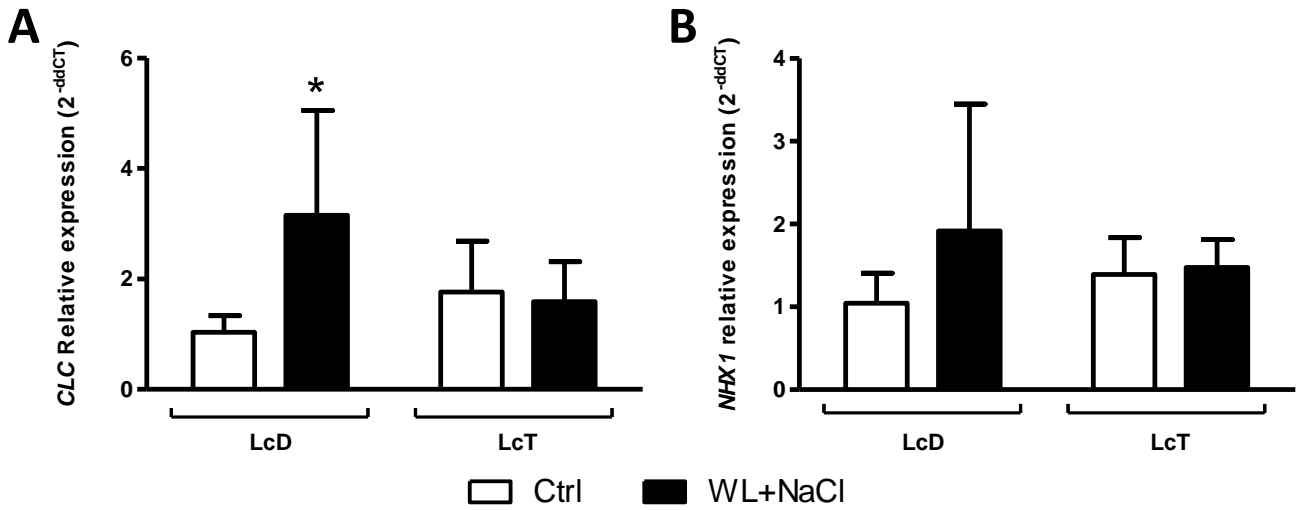

**Figure 5. Relative expression of *CLC* (A) and *NHX1* (B) genes.** The values represent the mean  $\pm$  SD ( $n = 3$ ). Statistical analysis of relative expression was performed by comparing the relative expression of the genes based on the pairwise fixed reallocation randomization test ( $p < 0.05$ ). Asterisk show significant differences ( $p < 0.05$ ). White bars, control treatment (Ctrl); Black bars, combined stress (WL+NaCl).



# Supplementary Figures

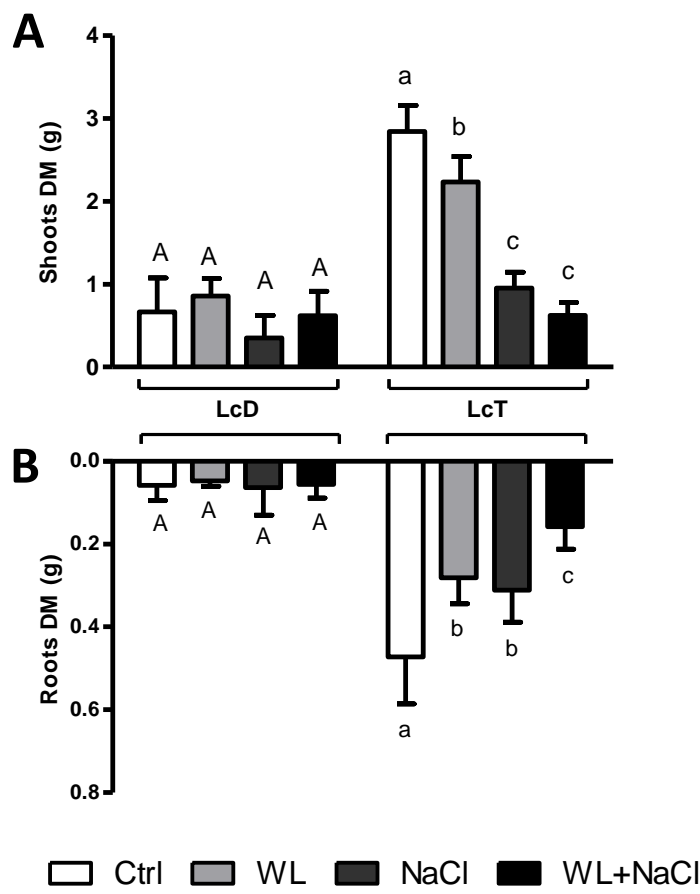

**Supplementary Figure 1. Shoots and roots dry mass accumulation of *L. corniculatus* accessions subjected to the different stress treatments.** The measured shoots (A) and roots (B) dry mass is shown in grams ( $n = 5 \pm SE$ ). Means without common letters differ significantly within each of the accessions (one-way ANOVA; Duncan,  $p < 0.05$ ). White bars, control conditions (Ctrl); light gray bars waterlogging stress (WL); dark gray bars, saline stress (NaCl); black bars, combined stress (WL+NaCl).

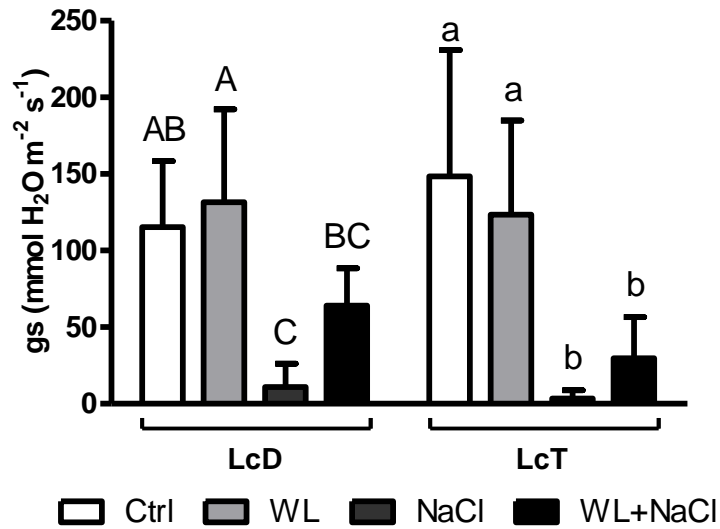

**Supplementary Figure 2. Stomatal conductance of the *L. corniculatus* accessions under the different stress treatments.** The stomatal conductance was measured for five independent biological replicates ( $n = 5 \pm \text{SD}$ ). Means without common letters differ significantly within each of the accessions (one-way ANOVA; Duncan,  $p < 0.05$ ). White bars, control conditions (Ctrl); light gray bars waterlogging stress (WL); dark gray bars, saline stress (NaCl); black bars, combined stress (WL+NaCl).
